# Supplementary material for: Apolipoprotein E mimetic peptide, CN‐105, improves outcomes in ischemic stroke
Source: PubMed Central journal article supplement (PMC5376751; doi:10.1002/acn3.399), 2017-03-09
Supplement: ACN3-4-246-s001.pdf [file ACN3-4-246-s001.pdf]

## **Supplementary Material 1: Physiological experiments of CN-105**

### **Materials and methods**

#### Vehicle and Test Article Preparation

The vehicle, 0.9% Sodium Chloride for Injection, USP, was prepared prior to handling the test article, by filtering an appropriate volume under a laminar flow hood using sterile equipment and aseptic techniques through a 0.22 micron polyvinylidene difluoride (PVDF) filter into a sterile receiver. Filtered vehicle was stored refrigerated at 2 to 8°C.

The test article, CN-105, was mixed with vehicle for at least 5 minutes using a magnetic stir bar and stir plate and until a visually clear, particulate free mixture was obtained. The contents of the mixing container were quantitatively transferred into a graduated cylinder, and the formulation was brought to volume with additional vehicle to achieve the final concentration of 1.25 mg/mL. The contents of the graduated cylinder were mixed thoroughly by inversion. The formulation was returned to the mixing container and stirred for at least 5 minutes using a magnetic stir bar and stir plate and until uniform in appearance. Under a laminar flow hood using sterile equipment and aseptic techniques, the formulation was filtered through 0.22 micron PVDF filter unit into an appropriate number of sterile receivers. Formulations of the test article were stored refrigerated at 2 to 8°C.

## Animal Acquisition and Acclimation

Twenty male and 20 female experimentally naïve CD [CrI:CD(SD)] rats of approximately 8 weeks of age at receipt (Charles River Laboratories, Portage, Michigan) were used. All animals were received with a previously implanted femoral vein catheter exteriorized between the scapulae for intravenous (IV) dosing purposes. During the acclimation period, the animals were observed daily with respect to general health and any signs of disease. All animals were given a detailed clinical examination prior to selection for study.

## Randomization, Assignment to Study, and Maintenance

Animals were assigned to the control and treatment groups via randomization. Each animal was assigned an animal number to be used in the Provantis data collection system and was implanted with a microchip bearing a unique identification number. The individual animal number, implant number, and study number comprised a unique identification for each animal. Each cage was identified by the animal number, study number, group number, and sex. The animals were individually housed in solid bottom cages with nonaromatic bedding in an environmentally controlled room. Fluorescent lighting was provided for approximately 12 hours per day. The dark cycle was interrupted intermittently due to study-related activities. Temperature and humidity were continuously monitored, recorded, and maintained to the maximum extent possible within the ranges of 68 to 79°F and 30 to 70%, respectively. Block Lab Diet (Certified Rodent Diet #5002, PMI Nutrition International, Inc.) was available ad libitum, except during designated periods. Tap water was available ad libitum to the additional animals received via

water bottles at receipt and throughout the duration of the study.

#### Drug/Vehicle administration

The vehicle (0 mg/kg/day) and test article (20 mg/kg/day) were administered intravenously (IV) via the surgically implanted femoral catheter. The test article and vehicle were administered over a 5 minute period four times per day for 14 consecutive days, 6 hours apart ( $\pm 30$  minutes from the start of one dose to start of next dose), for a total of 56 doses per animal. The total daily dose was split equally between the four daily doses.

Prior to and between each dose, the animals received a continuous infusion of 0.9% Sodium Chloride for Injection, USP, (saline) at a rate of approximately 0.4 mL/hr in order to maintain patency of the IV catheter. On the days of dosing, the infusion line was pre-filled with the dosing solution to ensure that dosing started as soon as the infusion pump was turned on. To ensure delivery of the complete dose, any dosing formulation remaining in the infusion line was flushed with saline administered at the same rate used for the test article (i.e., 48 mL/kg/hr) and was administered as part of the 5-minute infusion period. The dosing pumps were paused for approximately 1 minute between the dose and the flush to switch out syringes. Following the flush period, the infusion rate (saline) was returned to approximately 0.4 mL/hr.

#### Cageside Observations

All animals were observed for mortality and the availability of food and water twice daily. On

dosing days, the daily observations were conducted at 30 minutes post the end of the dose.

### Body weight measurements

Body weights for all animals were measured and recorded prior to randomization, and weekly during the study. The body weights collected prior to randomization are reported at the Week -1 interval.

### Respiratory Monitoring

Respiratory evaluations were performed on the first eight main study male animals per group. Animals were placed in a jacket and tether system prior to placement into the monitoring chamber. Each designated animal was placed in a plethysmograph chamber at least 2.5 hours prior to dosing. After at least 1.5 hours, respiratory monitoring was initiated to establish baseline data. The animals were dosed after at least 1 hour of continuous baseline recording and respiratory monitoring was continued for a period of at least 4 hours following the start of the first administration (Dose 1).

Data were logged into 1-minute intervals and reported in 15-minute time intervals. Only 1 hour of baseline data were reported. Food and water were not available to the animals during respiratory recording sessions. Respiratory rate, tidal volume and minute volume were monitored.

## Blood analysis

Blood analysis was conducted on all main study animals at the terminal necropsy. The animals had access to drinking water but were fasted overnight prior to scheduled sample collection. Blood samples (approximately 4 mL) were collected via the vena cava after carbon dioxide inhalation. The samples were collected into tubes containing K<sub>3</sub>EDTA for evaluation of hematology parameters, sodium citrate for evaluation of coagulation parameters, and serum separators with no anticoagulant for the clinical chemistry samples. The order of bleeding was by alternating one animal from each dose group, then repeating to reduce handling and time biases.

## Statistical analysis

For all hematological, biochemistry, body weight and temperature endpoints where sample sizes for all groups were three or greater, Levene's test was used to assess homogeneity of group variances. If Levene's test was significant ( $p < 0.01$ ), comparisons with the control group were made using Welch's t-test with a Bonferroni correction. If Levene's test was not significant ( $p \geq 0.01$ ), a pooled estimate of the variance (Mean Square Error or MSE) was computed from a one-way analysis of variance (ANOVA) and utilized by a Dunnett's comparison of each treatment group with the control group; however, because there were only two groups involved, the above methodology for testing homogeneity of variance applied and the Dunnett's test was reduced to a Student's t-test. When there was no variability, no inferential statistics were done. Results of all pair-wise comparisons are reported at the 0.05 and 0.01 significance levels. All endpoints were analyzed using two-tailed tests.

For all respiratory end-points (respiratory rate and minute volume), descriptive statistics and repeated measures analysis of covariance were used. The data were tabulated within each summary time interval and the arithmetic mean (Mean), number of subjects (N), least squares mean (LSMean), and standard error of the LSMean (LSMean s.e.) were calculated for each endpoint and treatment. The effect of treatment over time was evaluated using a repeated measures analysis of covariance. Factors in the model included treatment, time (after dose), the two-way interaction 'treatment by time', and covariate (average of the 1 hour of predose data). A mixed model approach was used for the analysis using an appropriate covariance structure. Results from the model with the smallest Akaike's Information Criterion (AIC) were used. The first order Kenward-Roger (KR) degrees of freedom approximation was utilized. Figures representing the LS Means were generated for each respiratory endpoint to supplement the statistical evaluation of response to treatment.

Monotonicity of dose response was examined using sequential linear trend tests based on ordinal spacing of dose levels. Two linear 'trend by time' interaction tests were performed: 1) high-dose 'linear trend by linear time' and 2) high-dose 'linear trend by quadratic time', both evaluated at the 0.05 significance level. Neither interaction was significant; therefore trend tests on treatment means were performed at the 0.05 level for the overall segment means only. No significant linear trends were detected among the overall segment treatment means; therefore non-monotonic dose responses were investigated. The overall effects of treatment and the 'treatment by time' interaction were tested using overall F-tests at the 0.05 significance level. Neither the 'treatment by time' interaction effect nor the treatment main effect was significant; therefore no further

analysis was conducted.

## Results of physiological study

### Mortality

Three study animals were found dead during the course of the study, including 2 control (out of 20) animals (one male and one female) and 1 treated (out of 20) female. The animals died on Day 7, Day 6, and Day 9 of the study, respectively. Cause of death was undetermined for all animals. These deaths are not considered to be test article related due to the higher incidence in controls as compared to treated animals.

### Body temperature

There was no difference in body temperature.

| 0 mg/kg/day               |       |    | 20 mg/kg/day |       |    |
|---------------------------|-------|----|--------------|-------|----|
| Mean                      | SD    | N  | Mean         | SD    | N  |
| <b>Predose</b>            |       |    |              |       |    |
| 37.00                     | 0.380 | 10 | 37.13        | 0.327 | 10 |
| <b>Immediate postdose</b> |       |    |              |       |    |
| 36.70                     | 0.249 | 10 | 36.70        | 0.521 | 10 |
| <b>4 hour postdose</b>    |       |    |              |       |    |
| 36.57                     | 0.416 | 10 | 36.53        | 0.583 | 10 |

## Body weight

Slight, decreases (5-6%) in mean weekly body weights, as compared to vehicle controls, were observed for both males and females, reaching statistical significance for females only. The observed decrease in body weight gain was likely related in part to lower body weights predose for both sexes, as compared to vehicle controls, despite randomization.

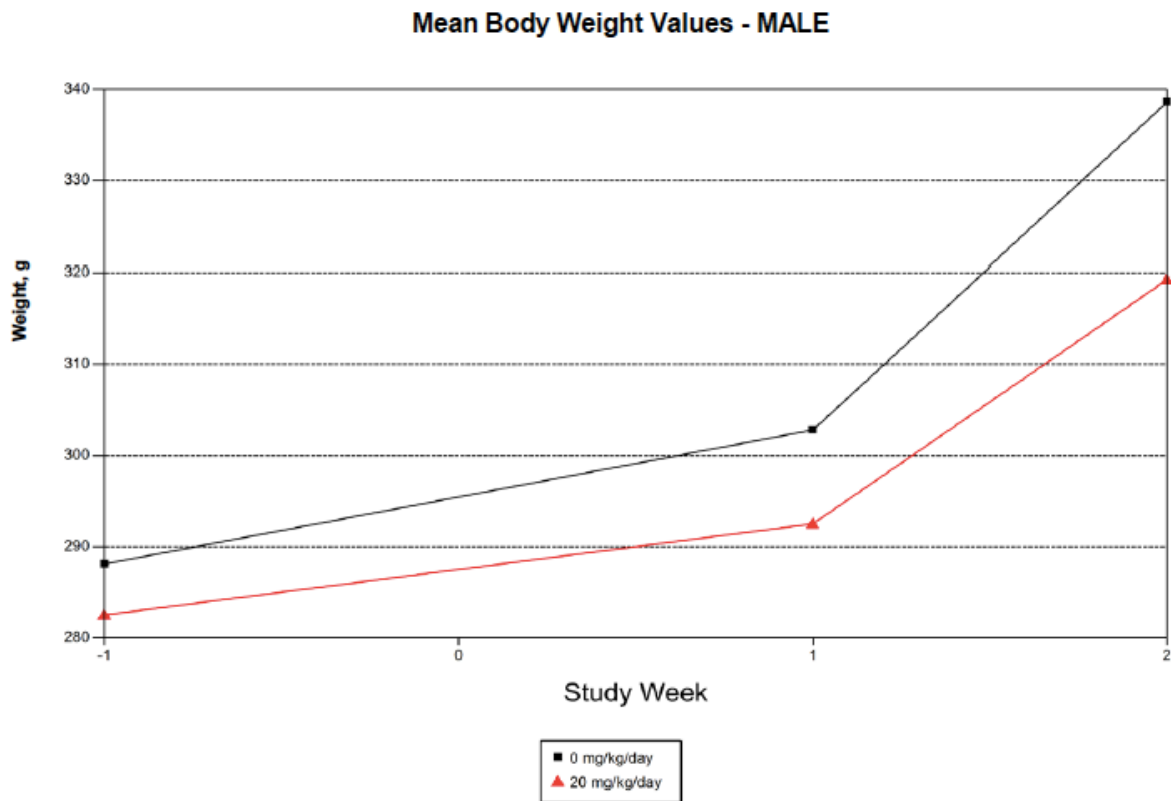



**Summary of Body Weight Values - MALE**

| Endpoint    | Study Interval (Week) | 0 mg/kg/day |       |    | 20 mg/kg/day |       |    |
|-------------|-----------------------|-------------|-------|----|--------------|-------|----|
|             |                       | Mean        | SD    | N  | Mean         | SD    | N  |
| Body Weight |                       |             |       |    |              |       |    |
| g           | -1                    | 288.1       | 12.02 | 10 | 282.5        | 7.58  | 10 |
|             | 1                     | 302.8       | 19.20 | 10 | 292.5        | 16.00 | 10 |
|             | 2                     | 338.6       | 25.98 | 9  | 319.3        | 22.12 | 10 |

**Mean Body Weight Values - FEMALE**

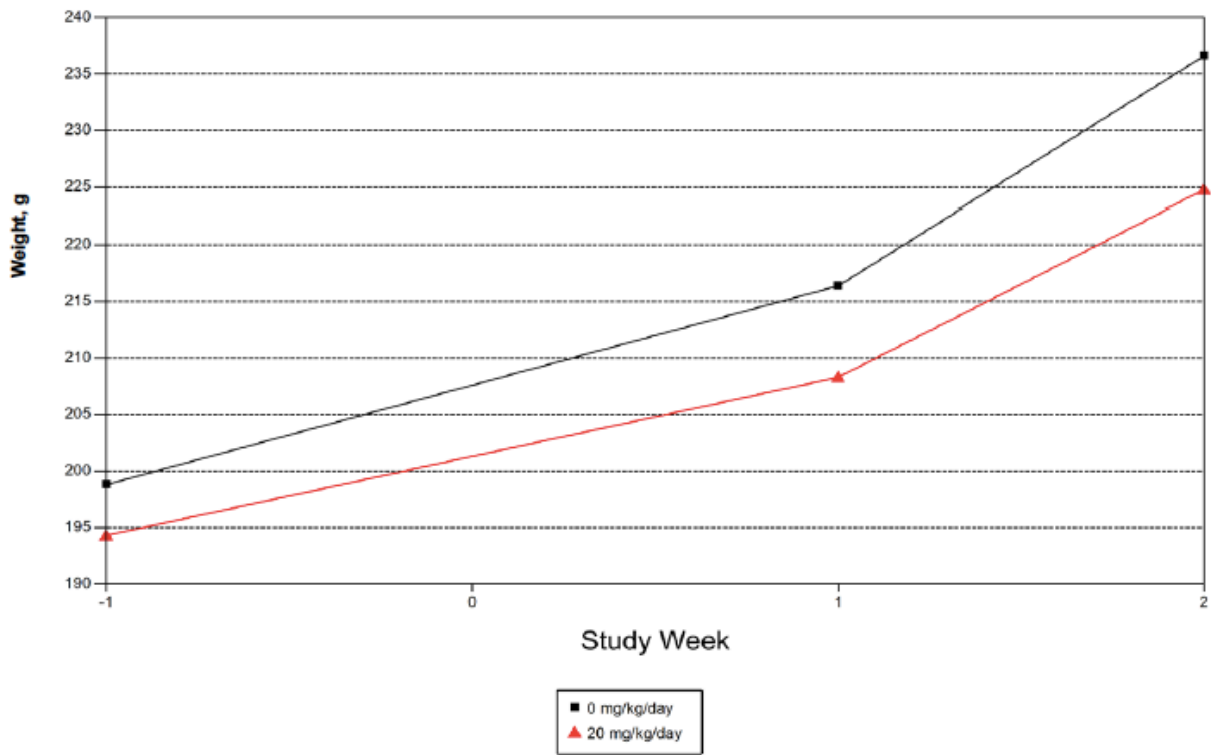

**Summary of Body Weight Values - FEMALE**

| Endpoint    | Study Interval (Week) | 0 mg/kg/day |      |    | 20 mg/kg/day       |       |    |
|-------------|-----------------------|-------------|------|----|--------------------|-------|----|
|             |                       | Mean        | SD   | N  | Mean               | SD    | N  |
| Body Weight |                       |             |      |    |                    |       |    |
| g           | -1                    | 198.8       | 9.32 | 10 | 194.3              | 6.62  | 10 |
|             | 1                     | 216.4       | 9.00 | 10 | 208.3              | 12.87 | 10 |
|             | 2                     | 236.6       | 9.34 | 9  | 224.8 <sup>a</sup> | 13.53 | 9  |

<sup>a</sup> Significantly different from control; (p<0.05)

## Respiratory Evaluations

LSMean respiratory rate values and minute volume values are illustrated and summarized below.

There were no CN-105-related effects on respiratory function observed over the course of the study.

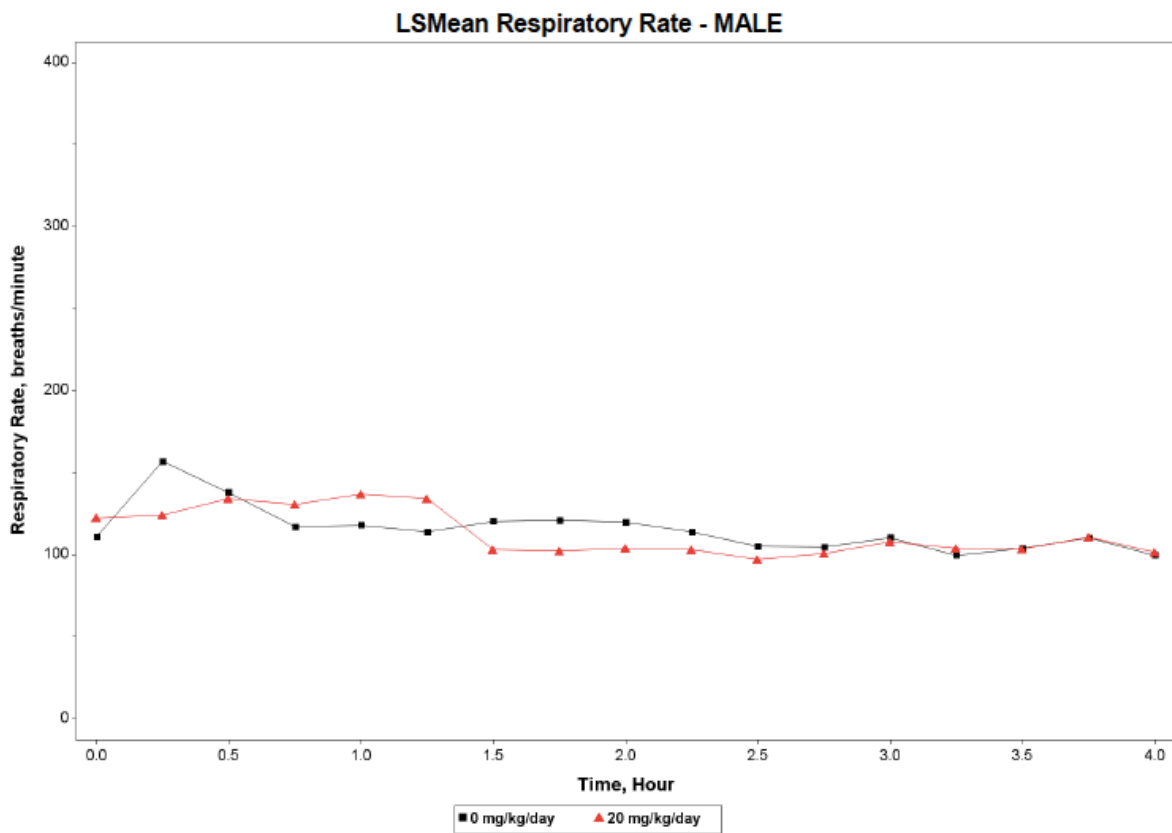

**Summary of Respiratory Rate, breaths/minute - MALE**  
 Analysis of 0:15 through 4:00 (hour:minute) Time Interval Values (Analysis Segment 1)  
 Covariate Mean = Average of 1-hour Predose, with ARH(1) Covariance Structure

| Type               |                                   | P-Value     |
|--------------------|-----------------------------------|-------------|
| TREND              | Linear Group*Linear Time Trend    | 0.7806 (NS) |
|                    | Linear Group*Quadratic Time Trend | 0.9036 (NS) |
| INTERACTION EFFECT | Group*Time                        | 0.6787 (NS) |
| MAIN EFFECT        | Group                             | 0.5571 (NS) |

**Summary of Respiratory Rate, breaths/minute - MALE**  
 Analysis of 0:15 through 4:00 (hour:minute) Time Interval Values (Analysis Segment 1)  
 Covariate Mean = Average of 1-hour Predose, with ARH(1) Covariance Structure

| Group        | Covariate Mean | Statistics    | Overall | 0:15    | 0:30    | 0:45    | 1:00    | 1:15    | 1:30    | 1:45    | 2:00    | 2:15    |
|--------------|----------------|---------------|---------|---------|---------|---------|---------|---------|---------|---------|---------|---------|
| 0 mg/kg/day  | 110.859        | Mean          | 115.089 | 156.104 | 137.222 | 116.322 | 117.405 | 113.189 | 119.739 | 120.309 | 119.210 | 113.068 |
|              |                | N             | 8       | 8       | 8       | 8       | 8       | 8       | 8       | 8       | 8       | 8       |
|              |                | LS Mean       | 115.664 | 156.680 | 137.798 | 116.897 | 117.981 | 113.764 | 120.314 | 120.885 | 119.786 | 113.643 |
|              |                | LSM s.e.      | 3.885   | 18.343  | 16.832  | 11.385  | 14.928  | 14.721  | 8.880   | 11.211  | 7.824   | 4.875   |
| 20 mg/kg/day | 122.395        | Mean          | 112.929 | 124.915 | 134.601 | 131.039 | 137.544 | 134.897 | 103.494 | 102.932 | 104.260 | 103.748 |
|              |                | N             | 8       | 8       | 8       | 8       | 8       | 8       | 8       | 8       | 8       | 8       |
|              |                | LS Mean       | 112.353 | 124.339 | 134.025 | 130.463 | 136.968 | 134.321 | 102.919 | 102.357 | 103.684 | 103.173 |
|              |                | LSM s.e.      | 3.885   | 18.343  | 16.832  | 11.385  | 14.928  | 14.721  | 8.880   | 11.211  | 7.824   | 4.875   |
|              |                | Trend p-value |         | 0.5571  |         |         |         |         |         |         |         |         |

**Summary of Respiratory Rate, breaths/minute - MALE**  
 Analysis of 0:15 through 4:00 (hour:minute) Time Interval Values (Analysis Segment 1)  
 Covariate Mean = Average of 1-hour Predose, with ARH(1) Covariance Structure

| Group        | Covariate Mean | Statistics    | 2:30    | 2:45    | 3:00    | 3:15    | 3:30    | 3:45    | 4:00    |
|--------------|----------------|---------------|---------|---------|---------|---------|---------|---------|---------|
| 0 mg/kg/day  | 110.859        | Mean          | 104.408 | 104.047 | 109.675 | 98.979  | 103.283 | 109.478 | 98.981  |
|              |                | N             | 8       | 8       | 8       | 8       | 8       | 8       | 8       |
|              |                | LS Mean       | 104.984 | 104.623 | 110.251 | 99.555  | 103.858 | 110.054 | 99.557  |
|              |                | LSM s.e.      | 4.588   | 4.639   | 10.006  | 2.756   | 6.105   | 13.615  | 5.196   |
| 20 mg/kg/day | 122.395        | Mean          | 97.641  | 101.315 | 108.440 | 104.510 | 104.215 | 111.354 | 101.957 |
|              |                | N             | 8       | 8       | 8       | 8       | 8       | 8       | 8       |
|              |                | LS Mean       | 97.066  | 100.740 | 107.865 | 103.934 | 103.639 | 110.778 | 101.381 |
|              |                | LSM s.e.      | 4.588   | 4.639   | 10.006  | 2.756   | 6.105   | 13.615  | 5.196   |
|              |                | Trend p-value |         |         |         |         |         |         |         |



**Summary of Minute Volume, mL/minute - MALE**  
 Analysis of 0:15 through 4:00 (hour:minute) Time Interval Values (Analysis Segment 1)  
 Covariate Mean = Average of 1-hour Predose, with ARH(1) Covariance Structure

| Group        | Covariate Mean | Statistics    | 2:30    | 2:45    | 3:00    | 3:15    | 3:30    | 3:45    | 4:00    |
|--------------|----------------|---------------|---------|---------|---------|---------|---------|---------|---------|
| 0 mg/kg/day  | 190.101        | Mean          | 170.178 | 167.336 | 170.045 | 164.103 | 171.665 | 169.968 | 170.192 |
|              |                | N             | 8       | 8       | 8       | 8       | 8       | 8       | 8       |
|              |                | LS Mean       | 168.018 | 165.176 | 167.885 | 161.943 | 169.505 | 167.807 | 168.032 |
|              |                | LSM s.e.      | 5.507   | 6.591   | 9.156   | 4.891   | 7.548   | 13.418  | 5.682   |
| 20 mg/kg/day | 183.223        | Mean          | 155.809 | 167.449 | 171.695 | 174.084 | 167.920 | 173.284 | 165.820 |
|              |                | N             | 8       | 8       | 8       | 8       | 8       | 8       | 8       |
|              |                | LS Mean       | 157.969 | 169.609 | 173.856 | 176.244 | 170.081 | 175.445 | 167.980 |
|              |                | LSM s.e.      | 5.507   | 6.591   | 9.156   | 4.891   | 7.548   | 13.418  | 5.682   |
|              |                | Trend p-value |         |         |         |         |         |         |         |

### Hematology and coagulation parameters

There were no test article-related effects among hematology parameters, coagulation times (i.e. APTT or prothrombin time) or fibrinogen in either sex administered 20 mg/kg/day at 14 days. All mean and individual values were within an acceptable range for biologic and procedure-related variation.

**Summary of Hematology Values - MALE**

| Endpoint                                      | Study Interval | 0 mg/kg/day |        |   | 20 mg/kg/day       |        |    |
|-----------------------------------------------|----------------|-------------|--------|---|--------------------|--------|----|
|                                               |                | Mean        | SD     | N | Mean               | SD     | N  |
| Leukocytes<br>10 <sup>3</sup> /μL             | Terminal       | 12.90       | 3.151  | 9 | 12.52              | 3.402  | 10 |
| Erythrocytes<br>10 <sup>6</sup> /μL           | Terminal       | 8.014       | 0.7955 | 9 | 8.192              | 0.6311 | 10 |
| Hemoglobin<br>g/dL                            | Terminal       | 15.64       | 1.702  | 9 | 15.68              | 1.434  | 10 |
| Hematocrit<br>%                               | Terminal       | 51.66       | 5.684  | 9 | 51.62              | 5.891  | 10 |
| MCV<br>fL                                     | Terminal       | 64.50       | 4.424  | 9 | 62.90              | 3.253  | 10 |
| MCH<br>pg                                     | Terminal       | 19.51       | 0.885  | 9 | 19.12              | 0.846  | 10 |
| MCHC<br>g/dL                                  | Terminal       | 30.29       | 1.001  | 9 | 30.45              | 1.197  | 10 |
| Platelets<br>10 <sup>3</sup> /μL              | Terminal       | 884.2       | 234.11 | 9 | 881.1              | 209.83 | 10 |
| Absolute Reticulocytes<br>10 <sup>3</sup> /μL | Terminal       | 245.97      | 52.756 | 9 | 253.34             | 51.560 | 10 |
| Neutrophils<br>10 <sup>3</sup> /μL            | Terminal       | 2.197       | 0.6269 | 9 | 1.908              | 0.8581 | 10 |
| Lymphocytes<br>10 <sup>3</sup> /μL            | Terminal       | 10.036      | 2.5480 | 9 | 9.955              | 2.8660 | 10 |
| Monocytes<br>10 <sup>3</sup> /μL              | Terminal       | 0.266       | 0.1674 | 9 | 0.312              | 0.1841 | 10 |
| Eosinophils<br>10 <sup>3</sup> /μL            | Terminal       | 0.177       | 0.0640 | 9 | 0.126 <sup>a</sup> | 0.0384 | 10 |
| Basophils<br>10 <sup>3</sup> /μL              | Terminal       | 0.078       | 0.0721 | 9 | 0.104              | 0.1245 | 10 |
| APTT<br>sec                                   | Terminal       | 16.18       | 1.339  | 8 | 15.19              | 2.271  | 8  |
| Prothrombin Time<br>sec                       | Terminal       | 16.05       | 0.849  | 8 | 16.46              | 0.981  | 9  |
| Fibrinogen<br>mg/dL                           | Terminal       | 458.1       | 74.31  | 8 | 506.7              | 91.39  | 9  |

**Summary of Hematology Values - FEMALE**

| Endpoint                                      | Study Interval | 0 mg/kg/day |        |   | 20 mg/kg/day |        |   |
|-----------------------------------------------|----------------|-------------|--------|---|--------------|--------|---|
|                                               |                | Mean        | SD     | N | Mean         | SD     | N |
| Leukocytes<br>10 <sup>3</sup> /μL             | Terminal       | 9.86        | 4.692  | 9 | 9.86         | 2.024  | 8 |
| Erythrocytes<br>10 <sup>6</sup> /μL           | Terminal       | 7.779       | 0.4735 | 9 | 7.925        | 0.4186 | 8 |
| Hemoglobin<br>g/dL                            | Terminal       | 15.39       | 0.947  | 9 | 15.61        | 0.740  | 8 |
| Hematocrit<br>%                               | Terminal       | 50.32       | 3.789  | 9 | 51.23        | 2.839  | 8 |
| MCV<br>fL                                     | Terminal       | 64.70       | 2.628  | 9 | 64.66        | 2.451  | 8 |
| MCH<br>pg                                     | Terminal       | 19.77       | 0.464  | 9 | 19.71        | 0.708  | 8 |
| MCHC<br>g/dL                                  | Terminal       | 30.59       | 1.265  | 9 | 30.54        | 1.041  | 8 |
| Platelets<br>10 <sup>3</sup> /μL              | Terminal       | 914.9       | 203.02 | 9 | 901.1        | 142.08 | 8 |
| Absolute Reticulocytes<br>10 <sup>3</sup> /μL | Terminal       | 235.27      | 49.191 | 9 | 260.64       | 40.629 | 8 |
| Neutrophils<br>10 <sup>3</sup> /μL            | Terminal       | 1.268       | 0.7349 | 9 | 1.259        | 0.6529 | 8 |
| Lymphocytes<br>10 <sup>3</sup> /μL            | Terminal       | 8.102       | 3.9695 | 9 | 8.178        | 2.0508 | 8 |
| Monocytes<br>10 <sup>3</sup> /μL              | Terminal       | 0.179       | 0.0655 | 9 | 0.161        | 0.0559 | 8 |
| Eosinophils<br>10 <sup>3</sup> /μL            | Terminal       | 0.153       | 0.0941 | 9 | 0.121        | 0.0429 | 8 |
| Basophils<br>10 <sup>3</sup> /μL              | Terminal       | 0.054       | 0.0224 | 9 | 0.050        | 0.0131 | 8 |
| APTT<br>sec                                   | Terminal       | 13.51       | 1.667  | 9 | 14.05        | 1.818  | 8 |
| Prothrombin Time<br>sec                       | Terminal       | 15.68       | 0.360  | 9 | 15.61        | 0.704  | 8 |
| Fibrinogen<br>mg/dL                           | Terminal       | 371.7       | 76.83  | 9 | 347.1        | 74.50  | 8 |

## Biochemistry parameters

Chloride was statistically increased (up to +2%) at the terminal collection in both sexes administered 20 mg/kg/day. Increases in chloride were not considered biologically relevant given the small magnitude of the changes. Despite a few other statistically significant alterations, no other test article-related effects were noted among clinical chemistry analytes in either sex administered 20 mg/kg/day. All other mean and individual values were within an acceptable range for biologic and procedure-related variation.



**Summary of Clinical Chemistry Values - MALE**

| Endpoint                    | Study Interval | 0 mg/kg/day |       |   | 20 mg/kg/day       |       |    |
|-----------------------------|----------------|-------------|-------|---|--------------------|-------|----|
|                             |                | Mean        | SD    | N | Mean               | SD    | N  |
| Sodium<br>mEq/L             | Terminal       | 142.7       | 1.94  | 9 | 142.4              | 2.27  | 10 |
| Potassium<br>mEq/L          | Terminal       | 8.43        | 1.580 | 9 | 9.61               | 1.899 | 10 |
| Chloride<br>mEq/L           | Terminal       | 100.6       | 1.24  | 9 | 102.4 <sup>a</sup> | 1.51  | 10 |
| Calcium<br>mg/dL            | Terminal       | 11.42       | 0.474 | 9 | 11.36              | 0.392 | 10 |
| Phosphorus<br>mg/dL         | Terminal       | 11.61       | 1.004 | 9 | 12.00              | 1.023 | 10 |
| Alkaline Phosphatase<br>U/L | Terminal       | 169.6       | 23.70 | 9 | 186.4              | 41.31 | 10 |
| Total Bilirubin<br>mg/dL    | Terminal       | 0.11        | 0.033 | 9 | 0.14               | 0.052 | 10 |
| AST<br>U/L                  | Terminal       | 98.3        | 29.85 | 9 | 109.0              | 15.86 | 10 |
| ALT<br>U/L                  | Terminal       | 40.9        | 8.30  | 9 | 42.0               | 8.71  | 10 |
| Urea Nitrogen<br>mg/dL      | Terminal       | 17.7        | 2.55  | 9 | 18.2               | 2.15  | 10 |
| Creatinine<br>mg/dL         | Terminal       | 0.31        | 0.060 | 9 | 0.29               | 0.032 | 10 |
| Total Protein<br>g/dL       | Terminal       | 5.99        | 0.226 | 9 | 6.01               | 0.318 | 10 |
| Albumin<br>g/dL             | Terminal       | 2.94        | 0.181 | 9 | 2.77               | 0.279 | 10 |
| Globulin<br>g/dL            | Terminal       | 3.04        | 0.279 | 9 | 3.24               | 0.398 | 10 |

<sup>a</sup> Significantly different from control; (p<0.05)

**Summary of Clinical Chemistry Values - FEMALE**

| Endpoint                    | Study Interval | 0 mg/kg/day |       |   | 20 mg/kg/day       |       |   |
|-----------------------------|----------------|-------------|-------|---|--------------------|-------|---|
|                             |                | Mean        | SD    | N | Mean               | SD    | N |
| Sodium<br>mEq/L             | Terminal       | 139.8       | 3.38  | 9 | 140.0              | 1.32  | 9 |
| Potassium<br>mEq/L          | Terminal       | 10.84       | 3.015 | 9 | 10.66              | 1.109 | 9 |
| Chloride<br>mEq/L           | Terminal       | 101.6       | 1.01  | 9 | 102.9 <sup>b</sup> | 0.78  | 9 |
| Calcium<br>mg/dL            | Terminal       | 11.90       | 0.497 | 9 | 11.56              | 0.482 | 9 |
| Phosphorus<br>mg/dL         | Terminal       | 12.07       | 0.934 | 9 | 11.80              | 1.077 | 9 |
| Alkaline Phosphatase<br>U/L | Terminal       | 128.8       | 41.05 | 9 | 120.9              | 19.67 | 9 |
| Total Bilirubin<br>mg/dL    | Terminal       | 0.10        | 0.000 | 9 | 0.12               | 0.044 | 9 |
| AST<br>U/L                  | Terminal       | 96.0        | 19.53 | 9 | 102.4              | 14.14 | 9 |
| ALT<br>U/L                  | Terminal       | 35.0        | 3.91  | 9 | 37.3               | 6.80  | 9 |
| Urea Nitrogen<br>mg/dL      | Terminal       | 17.8        | 1.09  | 9 | 18.3               | 1.66  | 9 |
| Creatinine<br>mg/dL         | Terminal       | 0.32        | 0.044 | 9 | 0.36               | 0.053 | 9 |
| Total Protein<br>g/dL       | Terminal       | 6.49        | 0.257 | 9 | 6.38               | 0.367 | 9 |
| Albumin<br>g/dL             | Terminal       | 3.33        | 0.312 | 9 | 3.26               | 0.240 | 9 |
| Globulin<br>g/dL            | Terminal       | 3.16        | 0.279 | 9 | 3.12               | 0.282 | 9 |

<sup>b</sup> Significantly different from control; (p<0.01)
