# Supplementary material for: Apolipoprotein E mimetic peptide, CN‐105, improves outcomes in ischemic stroke
Source: PubMed Central journal article supplement (PMC5376751; doi:10.1002/acn3.399), 2017-03-09
Supplement: ACN3-4-246-s004.pdf [file ACN3-4-246-s004.pdf]

**Table S1.** Principal Biological Process of Differentially Significant Phosphoproteins

| Biological Process#                             | Protein Name                                                      | Gene Symbol and UniProtKB number |
|-------------------------------------------------|-------------------------------------------------------------------|----------------------------------|
| Cell survival or differentiation processes (15) | Band 4.1-like protein 3                                           | EPB41L3, Q9WV92                  |
|                                                 | Casein kinase I isoform delta                                     | CSNK1D, Q9DC28                   |
|                                                 | Dynamin-1-like protein                                            | DNM1L, Q8K1M6                    |
|                                                 | Eukaryotic translation initiation factor 4 gamma 1                | EIF4G1, Q6NZJ6                   |
|                                                 | Glutathione S-transferase P 1                                     | GSTP1, P19157                    |
|                                                 | Heat shock protein 105                                            | HSPH1, Q61699                    |
|                                                 | Myotrophin                                                        | MTPN, P62774                     |
|                                                 | Myotubularin-related protein 5                                    | SBF1, Q6ZPE2                     |
|                                                 | Peptidyl-prolyl cis-trans isomerase A                             | PPIA, P17742                     |
|                                                 | Phosphatidylethanolamine-binding protein 1                        | PEBP1, P70296                    |
|                                                 | Programmed cell death 6-interacting protein                       | PDCD6IP, Q9WU78                  |
|                                                 | Protein arginine N-methyltransferase 8                            | PRMT8, Q6PAK3                    |
|                                                 | Rho GTPase-activating protein 35                                  | ARHGAP35, Q91YM2                 |
|                                                 | SH3 and PX domain-containing protein 2B                           | SH3PXD2B, A2AAY5                 |
|                                                 | Histone H4*                                                       | HIST1H4A, P62806                 |
| Cell communication and transport (25)           | 14-3-3 protein beta/alpha                                         | YWHAB, Q9CQV8                    |
|                                                 | Calcium-dependent secretion activator 2                           | CADPS2, Q8BYR5                   |
|                                                 | Cytoplasmic dynein 1 heavy chain 1                                | DYNC1H1, Q9JHU4                  |
|                                                 | Dynamin-1                                                         | DNM1, P39053                     |
|                                                 | EH domain-containing protein 3                                    | EHD3, Q9QXY6                     |
|                                                 | Myosin-Va                                                         | MYO5A, Q99104                    |
|                                                 | Neurochondrin                                                     | NCDN, Q9Z0E0                     |
|                                                 | Probable cationic amino acid transporter                          | SLC7A14, Q8BXR1                  |
|                                                 | Protein kinase C and casein kinase substrate in neurons protein 1 | PACSIN1, Q61644                  |
| Protein XRP2                                    | RP2, Q9EPK2                                                       |                                  |

|                                          |                                                                   |                   |
|------------------------------------------|-------------------------------------------------------------------|-------------------|
|                                          | Putative tyrosine-protein phosphatase auxilin                     | DNAJC6, Q80TZ3    |
|                                          | Receptor-type tyrosine-protein phosphatase-like N                 | PTPRN, Q60673     |
|                                          | Regulator of G-protein signaling 6                                | RGS6, Q9Z2H2      |
|                                          | Rho GTPase-activating protein 1                                   | ARHGAP1, Q5FWK3   |
|                                          | SLIT-ROBO Rho GTPase-activating protein 3                         | SRGAP3, Q812A2    |
|                                          | Src substrate cortactin                                           | CTTN, Q60598      |
|                                          | Synaptic vesicle glycoprotein 2B                                  | SV2B, Q8BG39      |
|                                          | Synaptogyrin-3                                                    | SYNGR3, Q8R191    |
|                                          | Syntaxin-binding protein 1                                        | STXBP1, O08599    |
|                                          | Type I inositol 3,4-bisphosphate 4-phosphatase                    | INPP4A, Q9EPW0    |
|                                          | Vesicular inhibitory amino acid transporter                       | SLC32A1, O35633   |
|                                          | Disks large-associated protein 2*                                 | DLGAP2, Q8BJ42    |
|                                          | Golgi integral membrane protein 4*                                | GOLIM4, Q8BXA1    |
|                                          | Probable phospholipid-transporting ATPase IA*                     | ATP8A1, P70704    |
|                                          | Sodium/potassium-transporting ATPase subunit alpha-1*             | ATP1A1, Q8VDN2    |
| Microtubule related functions (5)        | Calmodulin-regulated spectrin-associated protein 2                | CAMSAP1L1, Q8C1B1 |
|                                          | Calmodulin-regulated spectrin-associated protein 3                | KIAA1543, Q80VC9  |
|                                          | CLIP-associating protein 2                                        | CLASP2, Q8BRT1    |
|                                          | Microtubule-associated protein 6                                  | MAP6, Q7TSJ2      |
|                                          | Tubulin polymerization-promoting protein                          | TPPP, Q7TQD2      |
| Cytoskeletal organization (6)            | Ankyrin-2                                                         | ANK2, Q8C8R3      |
|                                          | Band 4.1-like protein 1                                           | EPB41L1, Q9Z2H5   |
|                                          | Coronin-1A                                                        | CORO1A, O89053    |
|                                          | Coronin-2A                                                        | CORO2A, Q8C0P5    |
|                                          | Protein EFR3 homolog B                                            | EFR3B, Q6ZQ18     |
|                                          | Protein FAM126B                                                   | FAM126B, Q8C729   |
| Metabolic and homeostasis processes (10) | 1-phosphatidylinositol-4,5-bisphosphate phosphodiesterase gamma-1 | PLCG1, Q62077     |
|                                          | Alpha-enolase                                                     | ENO1, P17182      |

|              |                                                                     |                |
|--------------|---------------------------------------------------------------------|----------------|
|              | Cytochrome c-type heme lyase                                        | HCCS, P53702   |
|              | Glutaminase kidney isoform                                          | GLS, D3Z7P3    |
|              | Phosphoglycerate kinase 1                                           | PGK1, P09411   |
|              | Thioredoxin reductase 1, cytoplasmic                                | TXNRD1, Q9JMH6 |
|              | Triosephosphate isomerase                                           | TPI1, P17751   |
|              | UPF0554 protein C2orf43 homolog                                     | LDAH, Q8BVA5   |
|              | Wolframin                                                           | WFS1, P56695   |
|              | Insulin receptor substrate 2*                                       | IRS2, P81122   |
| Immunity (2) | CMRF35-like molecule 8                                              | CD300A, Q6SJQ0 |
|              | Tyrosine-protein kinase                                             | LYN, P25911    |
| Unknown (3)  | LysM and putative peptidoglycan-binding domain-containing protein 2 | LYSMD2, Q9D7V2 |
|              | Probable G-protein coupled receptor 158                             | GPR158, Q8C419 |
|              | SH3 and cysteine-rich domain-containing protein 2                   | STAC2, Q8R1B0  |

All phosphoproteins listed are down-regulated in CN-105 compared to vehicle in ischemic stroke. The upregulated phosphoproteins are indicated with \*.

#Biological function information obtained from Universal Protein Resource (UniProt) at [www.uniprot.org](http://www.uniprot.org) on 25<sup>th</sup> September 2016
