# Supplementary material for: Apolipoprotein E mimetic peptide, CN‐105, improves outcomes in ischemic stroke
Source: PubMed Central journal article supplement (PMC5376751; doi:10.1002/acn3.399), 2017-03-09
Supplement: ACN3-4-246-s005.pdf [file ACN3-4-246-s005.pdf]

**Table S2.** Known Cell Signaling Pathways of Differentially Expressed Phosphoproteins

| Protein Name                                                      | Gene Symbol and UniProtKB number | Known Pathways Involved <sup>^</sup>                                                                                                                                                                                                                                               |
|-------------------------------------------------------------------|----------------------------------|------------------------------------------------------------------------------------------------------------------------------------------------------------------------------------------------------------------------------------------------------------------------------------|
| Insulin receptor substrate 2*                                     | IRS2, P81122                     | Gonadotropin-releasing hormone receptor pathway<br><br>Insulin/IGF pathway-mitogen activated protein kinase kinase/MAP kinase cascade<br><br>Insulin/IGF pathway-protein kinase B signaling cascade<br><br>Interleukin signaling pathway                                           |
| 1-phosphatidylinositol-4,5-bisphosphate phosphodiesterase gamma-1 | PLCG1, Q62077                    | 5HT2 type receptor mediated signaling pathway<br><br>Angiogenesis<br><br>Axon guidance mediated by netrin<br><br>CCKR signaling<br><br>EGF receptor signaling<br><br>FGF signaling<br><br>Histamine H1 receptor signaling<br><br>Inflammation mediated by chemokines and cytokines |

|                                            |                 |                                                                                                                                                                          |
|--------------------------------------------|-----------------|--------------------------------------------------------------------------------------------------------------------------------------------------------------------------|
|                                            |                 | <p>Oxytocin receptor mediated signaling</p> <p>PDGF signaling</p> <p>T cell activation</p> <p>Thyrotropin-releasing hormone receptor signaling</p> <p>VEGF signaling</p> |
| Alpha-enolase                              | ENO1, P17182    | Glycolysis                                                                                                                                                               |
| Casein kinase I isoform delta              | CSNK1D, Q9DC28  | <p>CCKR Signalling</p> <p>Circadian Clock System</p> <p>Parkinsons disease</p> <p>Wnt signaling</p>                                                                      |
| Cytoplasmic dynein 1 heavy chain 1         | DYNC1H1, Q9JHU4 | Huntington Disease                                                                                                                                                       |
| Dynamin-1                                  | DNM1, P39053    | <p>Gonadotropin-releasing hormone receptor</p> <p>CCKR Signaling</p>                                                                                                     |
| Myosin-Va                                  | MYO5A, Q99104   | Nicotinic acetylcholine receptor signaling                                                                                                                               |
| Phosphatidylethanolamine-binding protein 1 | PEBP1, P70296   | FGF signaling                                                                                                                                                            |

|                                                                   |                 |                                                                                           |
|-------------------------------------------------------------------|-----------------|-------------------------------------------------------------------------------------------|
| Phosphoglycerate kinase 1                                         | PGK1, P09411    | Glycolysis                                                                                |
| Protein kinase C and casein kinase substrate in neurons protein 1 | PACSIN1, Q61644 | Huntington Disease                                                                        |
| Regulator of G-protein signaling 6                                | RGS6, Q9Z2H2    | Heterotrimeric G-protein signaling pathway-Gq alpha and Go alpha mediated pathway         |
| Rho GTPase-activating protein 1                                   | ARHGAP1, Q5FWK3 | Angiogenesis<br>Cytoskeletal regulation by Rho GTPase<br>PDGF signaling<br>VEGF signaling |
| SLIT-ROBO Rho GTPase-activating protein 3                         | SRGAP3, Q812A2  | PDGF Signaling                                                                            |
| Syntaxin-binding protein 1                                        | STXBP1, O08599  | Synaptic Vesicle Trafficking                                                              |
| Triosephosphate isomerase                                         | TPI1, P17751    | Glycolysis and gluconeogenesis                                                            |
| Tyrosine-protein kinase                                           | LYN, P25911     | B-cell activation<br>Cadherin signaling<br>Parkinsons disease                             |

|  |  |                |
|--|--|----------------|
|  |  | CCKR signaling |
|--|--|----------------|

All phosphoproteins listed are down-regulated in CN-105 compared to Vehicle in Ischemic Stroke except those indicated with \*.  
^Pathways obtained from Protein Analysis Through Evolutionary Relationships (PANTHERS) classification system on [www.pantherdb.org](http://www.pantherdb.org) on 25<sup>th</sup> September 2016, version 3.4.1.
